# Supplementary material
Source: PubMed Central journal article supplement (PMC9616376)
Supplement: mmc1.pdf [file mmc1.pdf]

# Neighborhood Socioeconomic Disadvantage and the Neurobiology of Uncertainty in Traumatically Injured Adults

## *Supplement*

### Supplemental Methods

#### *MRI acquisition*

All imaging was collected on a General Electric Discovery MR750 3.0 Tesla scanner with a 32-channel head-coil (Waukesha, WI). A T1-weighted high-resolution anatomical scan was acquired for coregistration with the functional data and used the following parameters: FOV = 240mm; matrix = 256 x 224; slice thickness = 1mm; 150 slices; repetition time (TR)/ echo time (TE) = 8.2/3.2; flip angle = 12°, voxel size = 0.9375 x 1.071 x 1. Functional T<sub>2</sub>\*-weighted echoplanar images (EPI) were acquired with the following parameters: FOV = 22.4mm; matrix = 64 x 64; slice thickness = 3.5mm; 41 sagittal slices; TR/TE = 2000/25ms; flip angle = 77°. Each of the 4 runs was approximately 246 seconds (123 images).

#### *fMRI Preprocessing and Analysis*

Task-based fMRI data was analyzed using Analysis of Functional Neuroimages (AFNI) software (Cox, 1996). The first 3 volumes were removed and EPI data was slice-time corrected. Images were spatially smoothed (full-width-half-maximum = 4mm) and transformed to Montreal Neurological Institute space (MNI 152; McGill University, Montreal, Quebec). Head movements were corrected using a six-parameter (rigid body) linear transformation followed by a nonlinear transformation, with the minimum outlying volume as reference. EPI data was scaled to percent signal change. Volumes with excessive motion (Euclidian norm > .3mm), outlying TRs (> 10% outlying voxels), and head motion parameters were regressed out to improve signal-to-noise

ratio. Individuals were removed from analysis if more than 20% of TRs were censored (44 subjects).

### *Picture Anticipation Task*

Stimuli were presented using E-Prime 2.0 (Psychology Software Tools, Pittsburgh, PA) interfaced with an MRI compatible response box to record key presses. To keep subjects attending to the trials, subjects were asked to determine if the image was indoors or outdoors with a button press. All trials were included in fMRI analysis because accuracy across all conditions was acceptable (Overall  $M_{\text{accuracy}} = 75.5$ ). We hypothesize trial accuracy was considerably lower than noted in Somerville *et al.*, (2013) due to the trauma-related nature of the negative images.

There were 104 total images in the task (52 negative, 52 neutral; 26 per condition). Half of the images were from the International Affective Picture Set (Bradley & Lang, 2007) and half from the Nencki Affective Picture System (Marchewka *et al.*, 2014). Half of the images took place indoors and half outdoors. Stimuli were matched for number of images displaying people and images showing visible faces. The neutral images from the two picture sets were matched for valence (NAPS:  $M = 5.4$ ,  $SD = .57$ ; IAPS:  $M = 5.42$ ,  $SD = .47$ ) and arousal (NAPS:  $M = 4.81$ ,  $SD = .47$ ; IAPS:  $M = 3.51$ ,  $SD = .56$ ). The negative images were also matched for valence (NAPS:  $M = 2.09$ ,  $SD = .35$ ; IAPS:  $M = 2.04$ ,  $SD = .38$ ) and arousal (NAPS:  $M = 7.28$ ,  $SD = .41$ ; IAPS:  $M = 6.33$ ,  $SD = .64$ ).

### *Subjective Ratings of Anxiety*

At the end of each block of trials, participants completed a brief subjective rating to assess their level of anxiety associated with the block. They were asked to rate their anxiety on a scale from 1 “not at all anxious” to 9 “very anxious”: “How anxious did you feel during the

(first, second) set of trials in the previous run, which had (predictable, unpredictable) timings and (negative, neutral) images?” These subjective ratings were used as a manipulation check to determine if the anticipation and exposure to negative images elicited more anxiety than that of the neutral images, and to evaluate anxiety between predictable and unpredictable blocks of trials.

### **Supplemental Results**

#### *Without PTSD symptom covariates*

To evaluate activation related to ADI without adjusting for acute PTSD symptom severity, we repeated the analyses in the main text but removed the PCL (income, gender, and age still served as covariates). Findings overlapped with those reported in the main text for both the stimulus anticipation (Supplemental Table S1) and stimulus presentation (Supplemental Table S2) periods.

There was one notable difference in the ADI results compared to the main analysis during the stimulus presentation period. Greater ADI rankings were related to positive activation of the anterior insula to predictable neutral images and negative activation of the anterior insula to unpredictable neutral images. Insula activation in the face of unpredictability is frequently observed; however, the majority of studies (e.g. Gorka et al., 2016; Shankman et al., 2014) report insula hyperactivation to uncertain conditions. Interestingly, we found greater neighborhood disadvantage is associated with the contrary. In the context of the results presented in the main analysis, this further supports the association of neighborhood disadvantage with dysregulated uncertainty processing.

**Supplemental Table S1.**

Coordinates of peak whole brain activation by task condition during stimulus **anticipation period**  
*without controlling for PCL*

| <b>Task Condition</b> | <b>Brain Region</b>               | <b>X</b> | <b>Y</b> | <b>Z</b> | <b>k</b> | <b>Z</b> |
|-----------------------|-----------------------------------|----------|----------|----------|----------|----------|
| Neu > Neg             | Right middle temporal gyrus       | 45       | -67      | 0        | 22       | 3.86     |
|                       | Left middle occipital gyrus       | -46      | -71      | 0        | 41       | 4.97     |
| P > U                 | Right superior occipital gyrus    | 17       | -88      | 32       | 24       | 3.42     |
|                       | Right superior parietal lobule    | 35       | -53      | 60       | 15       | 4.77     |
| Uneu > Uneg           | Bilateral middle cingulate cortex | 0        | -32      | 46       | 27       | 3.87     |
| Uneu > Pneu           | Bilateral middle occipital gyrus  | 0        | -25      | 39       | 28       | 4.51     |
| Pneu > Uneu           | Left middle occipital gyrus       | 45       | 70       | 0        | 22       | 5.17     |
| Pneu > Uneu & ADI     | Right anterior cingulate cortex   | 7        | 27       | 25       | 16       | 3.69     |
| Uneu & ADI            | Left parahippocampal gyrus        | -18      | -32      | -21      | 24       | -3.30    |
|                       | Left piriform cortex              | -21      | 6        | -17      | 15       | -3.46    |
| Pneg & ADI            | Left middle occipital gyrus       | -39      | -81      | 0        | 41       | -5.25    |
|                       | Right inferior occipital gyrus    | 31       | -92      | -7       | 22       | -4.47    |
| Pneu & ADI            | Right hippocampus                 | 21       | -32      | -3       | 26       | 3.46     |

*Abbreviations:* U, unpredictable; P, predictable; Neg, negative; Neu, neutral; ADI, area deprivation index; XYZ, peak coordinates in standard space (MNI152); k, cluster size; Z, z-score. *Note:* For results with ADI, gender, age, and income were included as covariates in the model. Cluster thresholds: voxel wise:  $p < 0.001$ , cluster wise  $k > 14$ ,  $p < 0.05$ .

**Supplemental Table S2.**

Coordinates of peak whole brain activation by task condition during **stimulus presentation**  
without controlling for PCL

| <b>Task Condition</b>       | <b>Brain Region</b>             | <b>X</b> | <b>Y</b> | <b>Z</b> | <b>k</b> | <b>Z</b> |
|-----------------------------|---------------------------------|----------|----------|----------|----------|----------|
| Neg > Neu                   | Right fusiform gyrus            | 35       | -78      | -14      | 1531     | 7.50     |
|                             | Left fusiform gyrus             | -35      | 81       | -17      | 1422     | 7.13     |
|                             | Right precentral gyrus          | 42       | 6        | 28       | 525      | 7.24     |
|                             | Bilateral cerebellum            | 0        | -57      | -38      | 210      | 6.81     |
|                             | Left precentral gyrus           | -42      | 3        | 35       | 129      | 6.79     |
|                             | Left hippocampus                | -25      | -29      | -3       | 60       | 6.86     |
|                             | Left amygdala                   | -21      | -1       | -14      | 26       | 4.04     |
|                             | Left inferior frontal gyrus     | -49      | 38       | 11       | 24       | 4.76     |
|                             | Right thalamus                  | 21       | -32      | 4        | 18       | 4.66     |
|                             | Bilateral superior colliculi    | 3        | -32      | -3       | 16       | 3.45     |
| Uneg > Uneu                 | Right inferior occipital gyrus  | 31       | -81      | -14      | 660      | 5.09     |
|                             | Left inferior occipital gyrus   | -39      | -71      | -17      | 378      | 4.84     |
|                             | Right precentral gyrus          | 42       | 6        | 32       | 149      | 5.34     |
|                             | Left middle occipital gyrus     | -28      | -74      | 25       | 70       | 4.24     |
|                             | Left precentral gyrus           | -42      | 3        | 28       | 34       | 5.54     |
|                             | Right precentral gyrus          | 38       | -1       | 49       | 14       | 5.17     |
| Pneg > Pneu                 | Right fusiform gyrus            | 35       | -78      | -14      | 1014     | 5.66     |
|                             | Left fusiform gyrus             | -35      | -81      | -17      | 938      | 5.58     |
|                             | Right precentral gyrus          | 42       | 6        | 28       | 210      | 5.79     |
|                             | Bilateral cerebellum            | 0        | -57      | -38      | 144      | 6.01     |
|                             | Left precentral gyrus           | -45      | 3        | 35       | 53       | 4.72     |
|                             | Left hippocampus                | -21      | -29      | -3       | 50       | 4.14     |
|                             | Right inferior frontal gyrus    | 49       | 38       | 11       | 34       | 4.60     |
| Left inferior frontal gyrus | -49                             | 41       | 11       | 18       | 3.32     |          |
| Uneg & ADI                  | Left inferior temporal gyrus    | -49      | -43      | -17      | 24       | -3.92    |
| Uneu & ADI                  | Left parahippocampal gyrus      | -18      | -36      | -21      | 21       | -3.30    |
|                             | Left anterior insula            | -35      | 10       | -14      | 14       | -3.30    |
| Pneg & ADI                  | Right inferior frontal gyrus    | 42       | 34       | 11       | 82       | -5.22    |
|                             | Left anterior cingulate cortex  | -14      | 45       | -3       | 39       | -3.55    |
|                             | Right superior frontal gyrus    | 21       | 34       | 42       | 16       | -5.04    |
|                             | Left inferior temporal gyrus    | -46      | -39      | -17      | 14       | -3.37    |
| Pneu & ADI                  | Left middle temporal gyrus      | -56      | -64      | 21       | 81       | -3.35    |
|                             | Left posterior cingulate cortex | 0        | -43      | 32       | 77       | -3.60    |
|                             | Left superior frontal gyrus     | -21      | 66       | 4        | 51       | -3.44    |
|                             | Left calcarine gyrus            | -14      | -60      | 11       | 21       | -3.56    |
|                             | Right anterior insula           | 38       | 17       | -7       | 19       | 3.31     |
|                             | Left precentral gyrus           | -39      | -11      | 56       | 14       | -3.59    |

*Abbreviations:* **U**, unpredictable; **P**, predictable; **Neg**, negative; **Neu**, neutral; **ADI**, area deprivation index; **XYZ**, peak coordinates in standard space (MNI152); **k**, cluster size; **Z**, z-score. *Note:* For results with ADI, gender, age, and income were included as covariates in the model. Cluster thresholds: voxel wise:  $p < 0.001$ , cluster wise  $k > 14$ ,  $p < 0.05$ .

*Sensitivity Analysis*

To determine whether the results of the main analysis were driven by individuals living in the most disadvantaged neighborhoods (Bell et al., 2021; Webb et al., 2021), we excluded participants with ADI rankings greater than 90 ( $N = 17$ ) and reran all analyses ( $N = 73$ ). Results showed the same general pattern as those with the full sample (reported in the main text) during both the stimulus anticipation (Supplemental Table S3) and stimulus presentation periods (Supplemental Table S4), suggesting results were not driven by individuals living in the most disadvantaged contexts.

**Supplemental Table S3.**Coordinates of peak whole brain activation by task condition during stimulus **anticipation period**

| <b>Task Condition</b> | <b>Brain Region</b>              | <b>X</b> | <b>Y</b> | <b>Z</b> | <b>k</b> | <b>Z</b> |
|-----------------------|----------------------------------|----------|----------|----------|----------|----------|
| P > U                 | Left middle occipital gyrus      | -45      | -70      | 0        | 68       | 5.23     |
|                       | Right superior parietal lobule   | 21       | -67      | 63       | 41       | 5.02     |
|                       | Left superior parietal lobule    | -21      | -70      | 67       | 30       | 3.50     |
|                       | Right middle occipital gyrus     | 31       | -91      | 4        | 23       | 4.25     |
|                       | Right middle occipital gyrus     | 28       | -77      | 28       | 22       | 4.15     |
| Uneu > Uneg           | Right middle cingulate cortex    | 3.5      | -35      | 49       | 20       | 3.50     |
|                       | Right middle cingulate cortex    | 7        | -14      | 46       | 14       | 4.00     |
| Pneg > Uneg           | Right calcarine gyrus            | 7        | -84      | 11       | 52       | 4.06     |
| Pneu > Uneu           | Left middle occipital gyrus      | -45      | -70      | 0        | 46       | 5.55     |
| Pneu > Pneg & ADI     | Left cerebellum                  | -17      | -67      | -27      | 17       | 5.60     |
|                       | Right primary motor cortex       | 45       | 0        | 32       | 15       | 4.43     |
| Pneu > Uneu & ADI     | Right posterior cingulate cortex | 14       | -53      | 32       | 70       | 3.98     |
| Pneg & ADI            | Left middle occipital gyrus      | -38      | -81      | 0        | 69       | -4.48    |
|                       | Right primary motor cortex       | 45       | 0        | 32       | 22       | -4.98    |
|                       | Left cerebellum                  | -31      | -81      | -38      | 16       | -3.35    |
|                       | Right fusiform gyrus             | 28       | -88      | -3       | 15       | -3.53    |
|                       | Left middle temporal gyrus       | -45      | -53      | -3       | 15       | -4.60    |
| Pneu & ADI            | Right posterior cingulate cortex | 3.5      | -60      | 21       | 59       | 4.31     |

*Abbreviations:* **U**, unpredictable; **P**, predictable; **Neg**, negative; **Neu**, neutral; **ADI**, area deprivation index; **XYZ**, peak coordinates in standard space (MNI152); **k**, cluster size; **Z**, z-score. *Note:* For results with ADI, gender, age, PCL-5, and income were included as covariates in the model. Cluster thresholds: voxel wise:  $p < 0.001$ , cluster wise  $k > 14$ ,  $p < 0.05$ .

**Supplemental Table S4.**Coordinates of peak whole brain activation by task condition during **stimulus presentation**

| <i>Task Condition</i> | <i>Brain Region</i>                | <i>X</i> | <i>Y</i> | <i>Z</i> | <i>k</i> | <i>Z</i> |
|-----------------------|------------------------------------|----------|----------|----------|----------|----------|
| P > U                 | Left lingual gyrus                 | -7       | 91       | -6       | 32       | 4.77     |
| Neg > Neu             | Bilateral inferior occipital gyrus | 31       | -81      | -13      | 6499     | 10.73    |
|                       | Bilateral inferior frontal gyrus   | 38       | 6        | 32       | 3178     | 6.45     |
|                       | Right amygdala                     | 24       | -1       | -17      | 206      | 6.46     |
|                       | Right cerebellum                   | 14       | -50      | -49      | 29       | 5.59     |
|                       | Right inferior temporal gyrus      | 45       | 3        | -45      | 27       | 4.64     |
|                       | Left cerebellum                    | -49      | -67      | -42      | 14       | 4.17     |
| Uneg > Uneu           | Right inferior occipital gyrus     | 31       | -81      | -14      | 1640     | 7.78     |
|                       | Left inferior occipital gyrus      | -35      | -78      | -17      | 1323     | 5.83     |
|                       | Right inferior frontal gyrus       | 45       | 6        | 25       | 277      | 5.34     |
|                       | Bilateral cerebellum               | 0        | -57      | -38      | 110      | 4.47     |
|                       | Left precentral gyrus              | -42      | 3        | 32       | 94       | 4.60     |
|                       | Right inferior frontal gyrus       | 49       | 41       | 14       | 32       | 4.82     |
|                       | Left inferior parietal lobule      | -49      | -57      | 49       | 24       | 5.03     |
|                       | Right amygdala                     | 21       | -1       | -14      | 22       | 5.13     |
|                       | Left cingulate gyrus               | -24      | -50      | 21       | 15       | 3.66     |
|                       | Left middle frontal gyrus          | -46      | 24       | 39       | 14       | 4.34     |
| Pneg > Pneu           | Bilateral inferior occipital gyrus | 31       | -81      | -14      | 3636     | 7.34     |
|                       | Right inferior frontal gyrus       | 38       | 6        | 32       | 1103     | 5.49     |
|                       | Left inferior frontal gyrus        | -42      | 3        | 35       | 148      | 5.35     |
|                       | Right hippocampus                  | 24       | -29      | -3       | 103      | 5.88     |
|                       | Left inferior frontal gyrus        | -49      | 38       | 11       | 48       | 3.89     |
|                       | Left hippocampus                   | -25      | -29      | -3       | 42       | 5.55     |
|                       | Right middle cingulate gyrus       | 21       | -1       | 18       | 25       | 4.02     |
|                       | Right cerebellum                   | 10       | -81      | -42      | 24       | 4.67     |
|                       | Left amygdala                      | -21      | -4       | -14      | 23       | 4.63     |
|                       | Right fusiform gyrus               | 42       | -15      | -28      | 15       | 5.08     |
| Pneg > Uneg           | Right superior occipital gyrus     | 17       | -95      | 18       | 44       | 3.89     |
| Neu > Neg & ADI       | Left inferior temporal gyrus       | -49      | -43      | -17      | 61       | 3.9      |
|                       | Right middle temporal gyrus        | 49       | -56      | -3       | 22       | 3.67     |
| P > U & ADI           | Right precuneus                    | 3        | -46      | 46       | 31       | 4.56     |
| Pneu > Uneu & ADI     | Right middle cingulate cortex      | 10       | -39      | 42       | 24       | 4.19     |
| Uneg & ADI            | Left fusiform gyrus                | -38      | -50      | -17      | 87       | -4.42    |
|                       | Left calcarine gyrus               | -21      | -60      | 7        | 45       | -4.30    |
|                       | Right angular gyrus                | 45       | -57      | 42       | 39       | -4.16    |
|                       | Right precuneus                    | 7        | -57      | 46       | 22       | -4.11    |
|                       | Left inferior parietal lobule      | -49      | -57      | 46       | 17       | -3.95    |
|                       | Right fusiform gyrus               | 42       | -57      | -14      | 14       | -4.15    |
| Pneg & ADI            | Left inferior temporal gyrus       | -46      | -39      | -17      | 32       | -4.02    |
|                       | Left precuneus                     | -7       | -57      | 70       | 15       | -3.66    |

*Abbreviations:* **U**, unpredictable; **P**, predictable; **Neg**, negative; **Neu**, neutral; **ADI**, area deprivation index; **XYZ**, peak coordinates in standard space (MNI152); **k**, cluster size; **Z**, z-score. *Note:* For results with ADI, gender, age, PCL-5, and income were included as covariates in the model. Cluster thresholds: voxel wise:  $p < 0.001$ , cluster wise  $k > 14$ ,  $p < 0.05$ .



### Supplemental References

- Bell, K. L., Purcell, J. B., Harnett, N. G., Goodman, A. M., Mrug, S., Schuster, M. A., Elliott, M. N., Emery, S. T., & Knight, D. C. (2021). White Matter Microstructure in the Young Adult Brain Varies with Neighborhood Disadvantage in Adolescence. *Neuroscience*, *466*, 162–172. <https://doi.org/10.1016/j.neuroscience.2021.05.012>
- Bradley, M. M., & Lang, P. J. (2007). The International Affective Picture System (IAPS) in the study of emotion and attention. In *Handbook of emotion elicitation and assessment*. (pp. 29–46). Oxford University Press.
- Cox, R. W. (1996). AFNI: software for analysis and visualization of functional magnetic resonance neuroimages. *Computers and Biomedical Research, an International Journal*, *29*(3), 162–173. <https://doi.org/S0010480996900142> [pii]
- Gorka, S. M., Nelson, B. D., Phan, K. L., & Shankman, S. A. (2016). Intolerance of uncertainty and insula activation during uncertain reward. *Cognitive, Affective, & Behavioral Neuroscience*, *16*(5), 929–939. <https://doi.org/10.3758/s13415-016-0443-2>
- Marchewka, A., Żurawski, Ł., Jednoróg, K., & Grabowska, A. (2014). The Nencki Affective Picture System (NAPS): Introduction to a novel, standardized, wide-range, high-quality, realistic picture database. *Behavior Research Methods*, *46*(2), 596–610. <https://doi.org/10.3758/s13428-013-0379-1>
- Shankman, S., Gorka, S., Nelson, B., Fitzgerald, D., Phan, K., & O'Daly, O. (2014). Anterior insula responds to temporally unpredictable aversiveness: An fMRI study. *NeuroReport*, *25*(8), 596–600. <https://doi.org/10.1097/WNR.000000000000144>
- Somerville, L. H., Wagner, D. D., Wig, G. S., Moran, J. M., Whalen, P. J., & Kelley, W. M. (2013). Interactions Between Transient and Sustained Neural Signals Support the

Generation and Regulation of Anxious Emotion. *Cerebral Cortex*, 23(1), 49–60.

<https://doi.org/10.1093/cercor/bhr373>

Webb, E. K., Weis, C. N., Huggins, A. A., Fitzgerald, J. M., Bennett, K. P., Bird, C. M., Parisi, E. A., Kallenbach, M., Miskovich, T., Krukowski, J., deRoon-Cassini, T. A., & Larson, C. L. (2021). Neural impact of neighborhood socioeconomic disadvantage in traumatically injured adults. *Neurobiology of Stress*.

<https://doi.org/10.1016/j.ynstr.2021.100385>
